# Supplementary material for: Ag-decorated Bi2O3 nanospheres with enhanced visible-light-driven photocatalytic activities for water treatment
Source: Royal Society of Chemistry journal article supplement (doi:10.1039/c5ra12779c), 2015-01-01
Supplement: c5ra12779c1.pdf [file c5ra12779c1.pdf]

Electronic Supplementary Material (ESI) for RSC Advances  
This journal is © The Royal Society of Chemistry 2015

## Supporting Information:

### **Ag-decorated Bi<sub>2</sub>O<sub>3</sub> Nanospheres with Enhanced Visible-light-driven Photocatalytic Activities for Water Treatment**

Xin Zhong<sup>a</sup>, Zan Dai<sup>a</sup>, Fan Qin<sup>a</sup>, Ju Li<sup>a</sup>, Hao Yang<sup>a</sup>, Zhong Lu<sup>a</sup>, Ying Liang<sup>b</sup>, Rong Chen<sup>a,\*</sup>

<sup>a</sup> *Key Laboratory for Green Chemical Process of Ministry of Education and School of Chemistry  
and Environmental Engineering, Wuhan Institute of Technology, Xiongchu Street, Wuhan,  
430073, PR China.*

<sup>b</sup> *School of Chemical Engineering and Food Science, Hubei University of Arts and Science,  
Xiangyang, 441053, PR China.*

\* Corresponding author: Prof. R. Chen, E-mail: rchenhku@hotmail.com

Tel.: (+86)13659815698; fax: (+86)27-87195680.

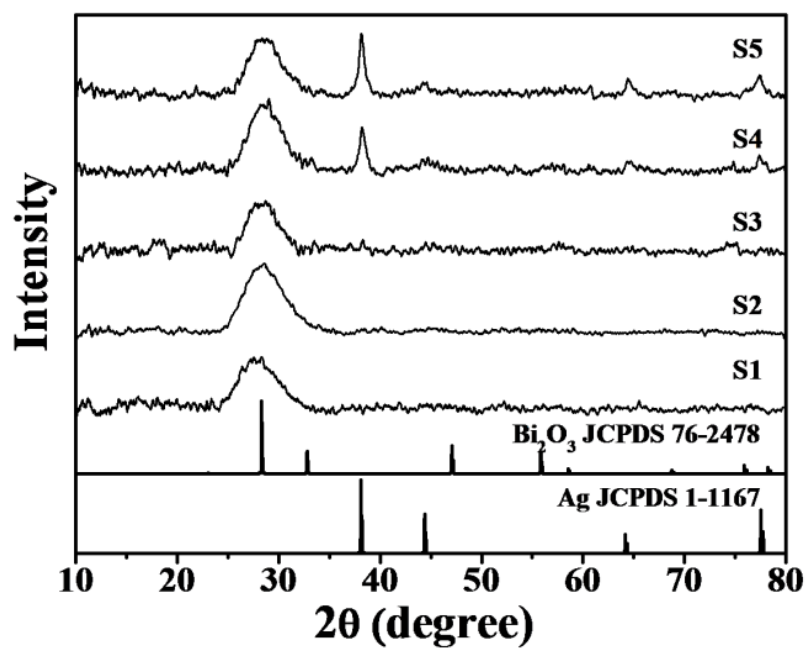

**Fig S1.** XRD patterns of  $\text{Bi}_2\text{O}_3$  nanospheres and Ag/ $\text{Bi}_2\text{O}_3$  products.

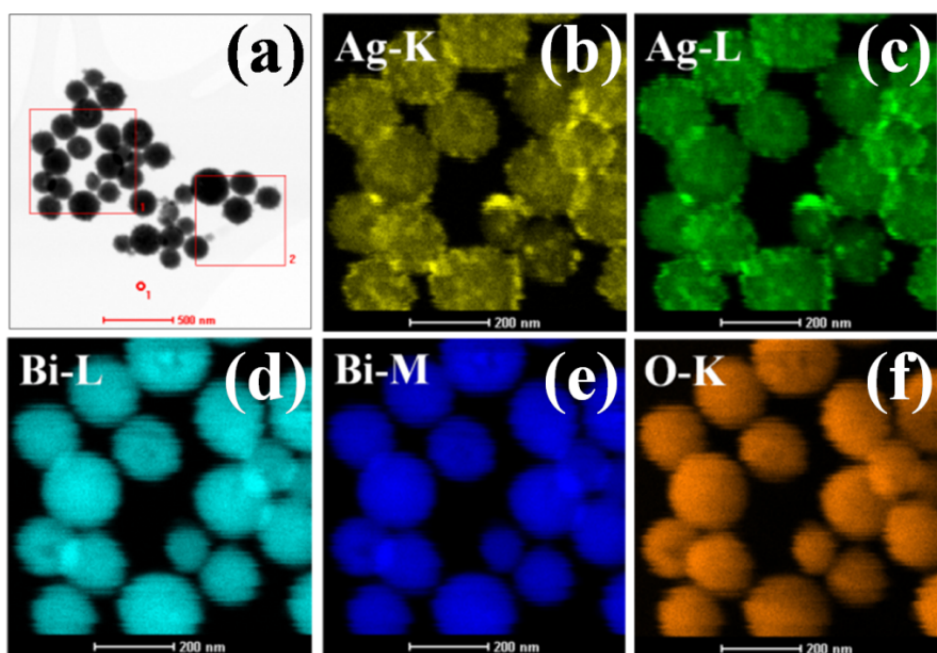

**Fig. S2** STEM image of a small area of **S5** (a) in bright field mode exhibiting elemental mapping. EDX Ag-K mapping ((b): yellow), EDX Ag-L mapping ((c): green), EDX Bi-L mapping ((d): cyan), EDX Bi-M mapping ((e): blue), and EDX O-K mapping ((f): orange) on the TEM image.

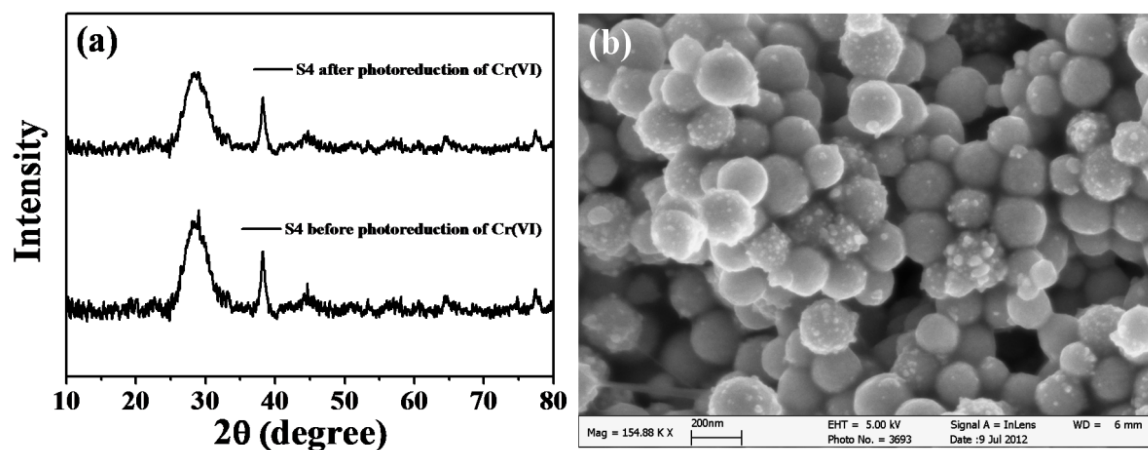

**Fig S3.** XRD pattern (a) and SEM image (b) analysis of 10 wt% Ag/Bi<sub>2</sub>O<sub>3</sub> (**S4**) after the photoreduction of Cr(VI).

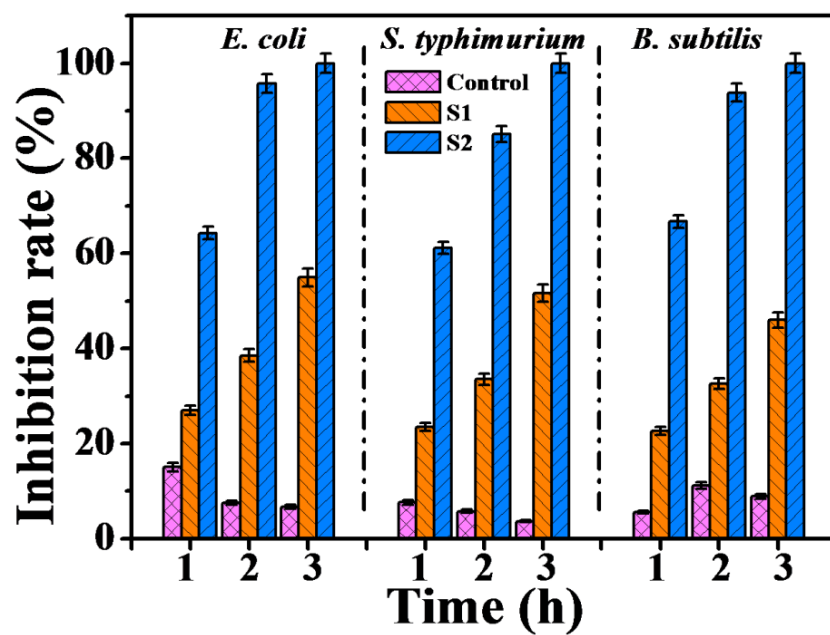

**Fig S4.** Photocatalytic disinfection of S1 and S2 for different bacteria upon visible light irradiation at different irradiation time.
